# Supplementary material for: Zika virus cleaves GSDMD to disseminate prognosticable and controllable oncolysis in a human glioblastoma cell model
Source: PubMed Central journal article supplement (PMC9845690; doi:10.1016/j.omto.2022.12.008), 2023-01-02
Supplement: mmc1.pdf [file mmc1.pdf]

OMTO, Volume 28

**Supplemental information**

**Zika virus cleaves GSDMD to disseminate  
prognosticable and controllable oncolysis  
in a human glioblastoma cell model**

**Yu-Ting Kao, Hsin-I Wang, Chi-Ting Shie, Chiou-Feng Lin, Michael M.C. Lai, and Chia-Yi Yu**

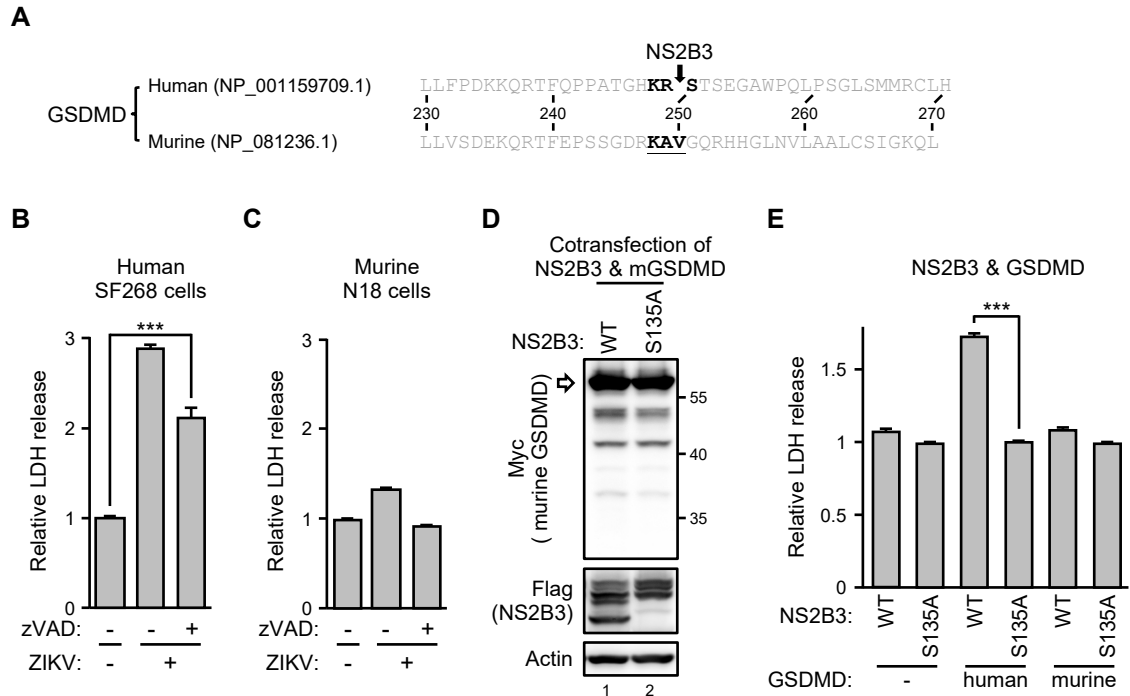

**Figure S1. ZIKV inducing caspase-independent pyroptosis is species-dependent.** (A) Corresponding amino acid sequences surrounding the ZIKV cleavage motif (KRS) of both human and murine GSDMD were aligned. (B, C) human glioblastoma SF268 cells (B) and murine neuroblastoma N18 cells (C) were infected with ZIKV in the absence (-) or presence (+) of zVAD (50  $\mu$ M). (D, E) 293T/17 cells were cotransfected with ZIKV protease NS2B3 (WT, wild-type; S135A, the protease-dead mutant) and GSDMDs; lysates were examined by western blot analysis (D), and the supernatant was analyzed for LDH release (E). mGSDMD, murine GSDMD. Data are mean  $\pm$  SD,  $n = 3$  per group. \*\*\* $p < 0.001$ .

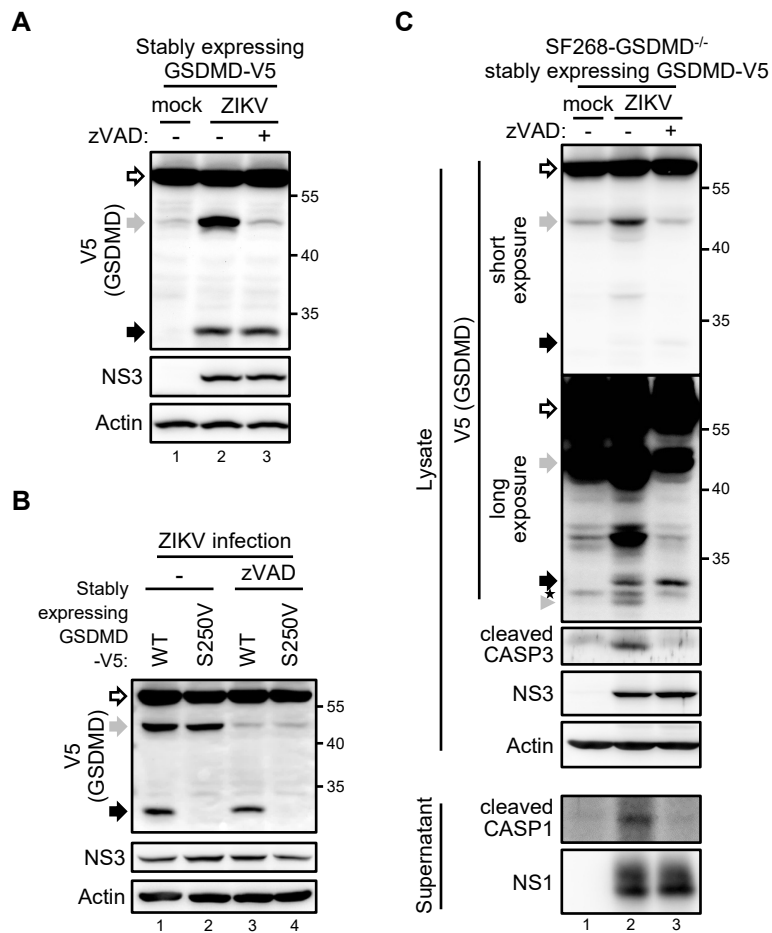

**Figure S2. ZIKV-induced caspase-dependent and -independent GSDMD cleavage.** (A) Mock- or ZIKV-infected Vero cells expressing full-length GSDMD-V5 in the absence (-) or presence (+) of zVAD (50  $\mu$ M) were examined by western blot analysis. (B) Vero cells stably expressing GSDMD WT or its S250V mutant were infected with ZIKV in the absence (-) or presence (+) of zVAD (50  $\mu$ M). (C) Mock- or ZIKV-infected SF268-GSDMD<sup>-/-</sup> cells expressing full-length GSDMD-V5 in the absence (-) or presence (+) of zVAD (50  $\mu$ M) were examined by western blot analysis. CASP3, caspase-3; CASP1, caspase-1. White arrows, full-length; black arrows, ZIKV protease-cleaved; gray arrows, CASP3-cleaved; gray triangle, CASP1-cleaved; star, non-specific.

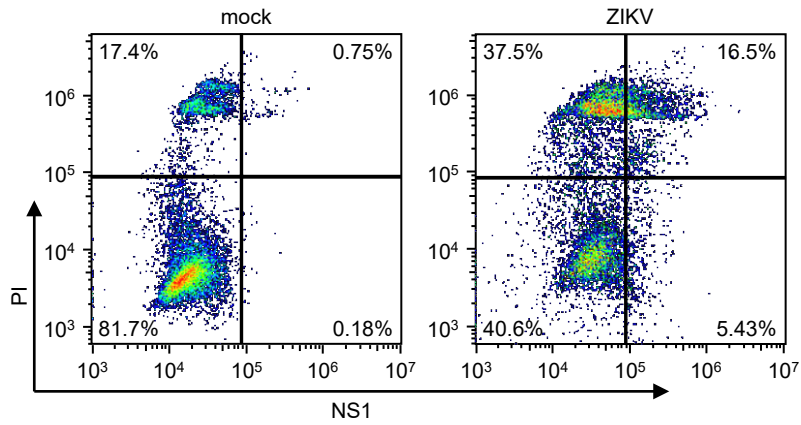

**Figure S3. Uninfected cells could die from being exposed to a cytotoxic environment established by ZIKV-infected cells.** SF268 cells were infected with ZIKV and live-stained for the cell surface NS1 and with PI, then analyzed by flow cytometry. NS1-negative, uninfected.

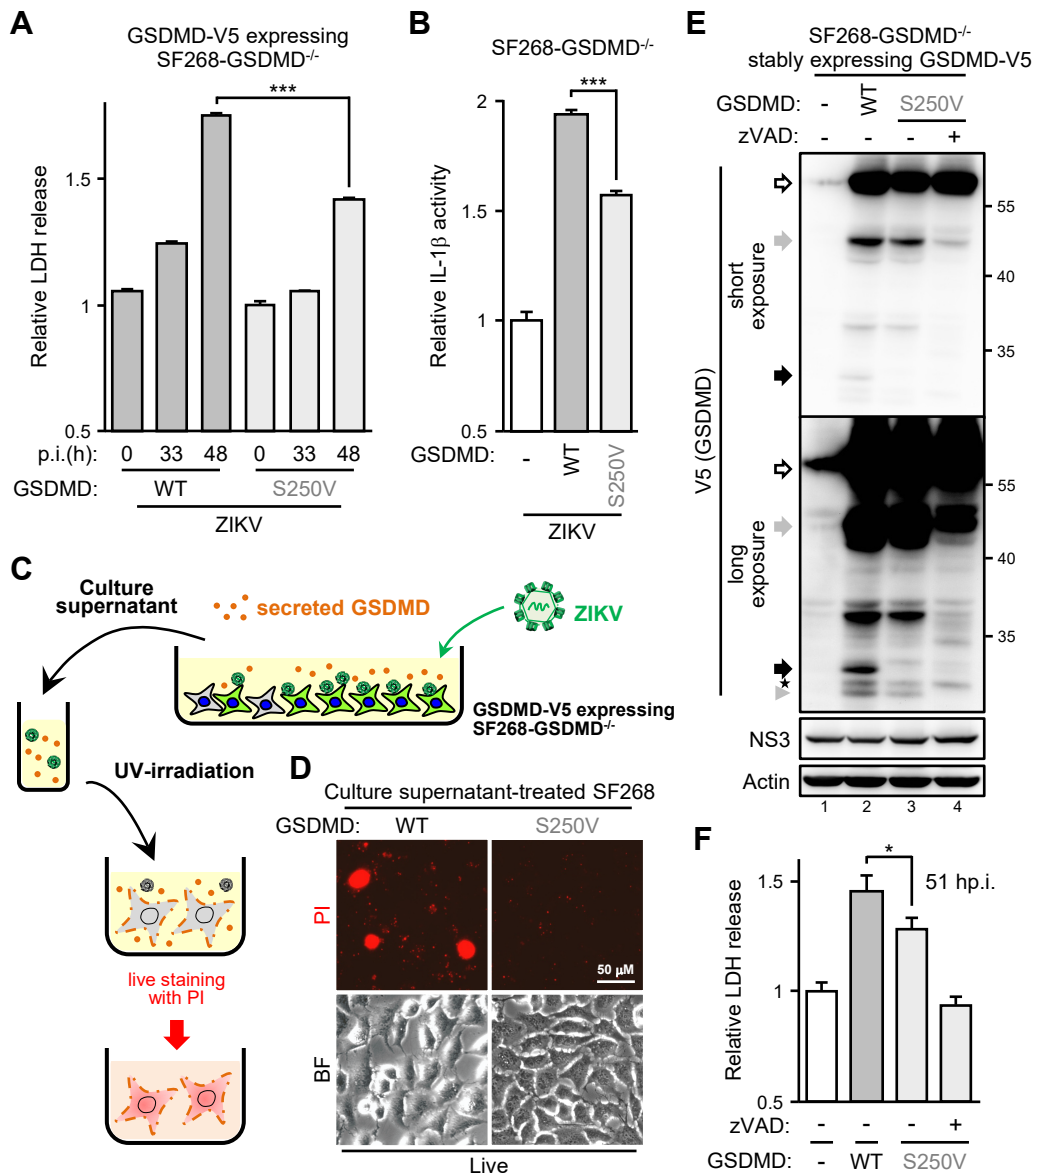

**Figure S4. ZIKV-induced cytotoxicity was attenuated by the GSDMD S250V mutant.** (A, B) SF268-GSDMD<sup>-/-</sup> cells stably expressing the V5-tagged GSDMD were infected with ZIKV as indicated. The supernatant was measured for LDH release (A) and IL-1 $\beta$  secretion (B). p.i., postinfection. (C, D) The culture supernatant from ZIKV-infected SF268-GSDMD<sup>-/-</sup> cells expressing the indicated GSDMD was UV-inactivated and used as the conditioned media incubating the naïve SF268 cells. Red, PI live-staining; BF, bright-field. (E, F) SF268-GSDMD<sup>-/-</sup> cells expressing the indicated GSDMD-V5 were infected with ZIKV in the absence (-) or presence (+) of zVAD (50  $\mu$ M). The indicated protein levels were examined by western blot (E), and the supernatant was analyzed for LDH release (F). White arrows, full-length; black arrows, ZIKV protease-cleaved; gray arrows, CASP3-cleaved; gray triangle, CASP1-cleaved; star, non-specific. Data are mean  $\pm$  SD, n = 3 per group. \*p < 0.05, and \*\*\*p < 0.001.

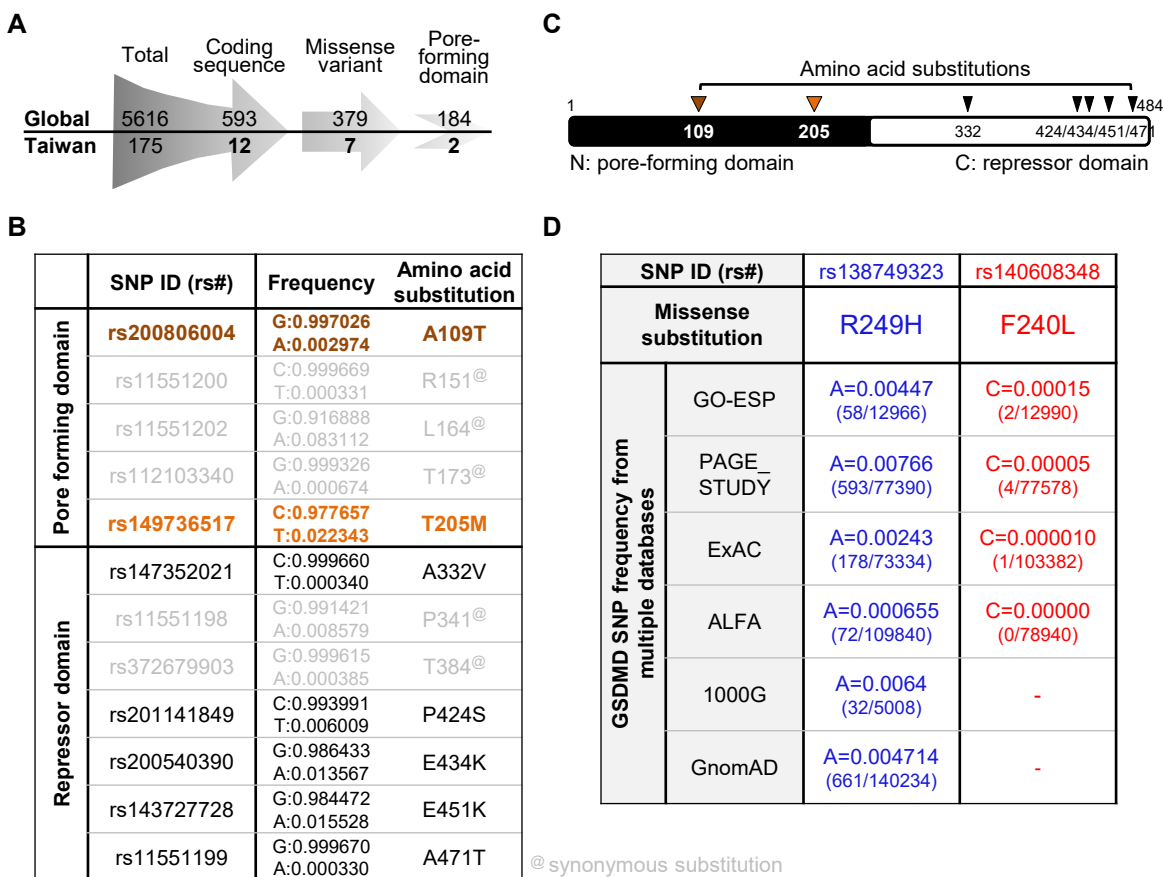

**Figure S5. Representative GSDMD SNPs related to this study.** (A) The number of GSDMD SNPs in the Taiwan BioBank and the global NCBI 1000 Genomes Project data (dbSNP) by the indicated selection strategy. (B) The 12 GSDMD SNPs residing within the coding sequence. (C) Schematic illustrations of human GSDMDs with the functional domain and the SNPs with amino acid substitution mentioned. (D) Frequency (%) of two GSDMD variants, R249H (SNP rs138749323) and F240L (SNP rs140608348), in the human population.

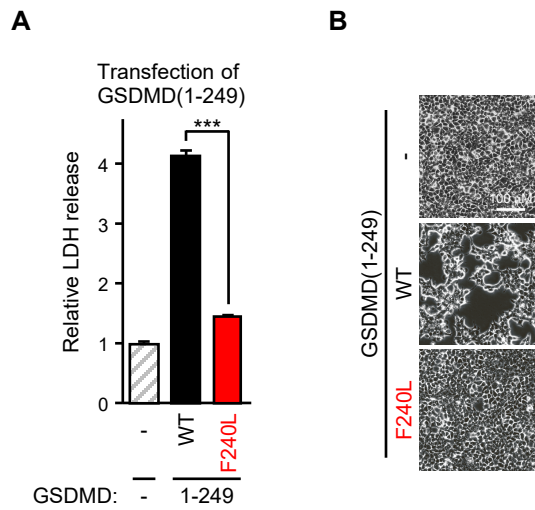

**Figure S6. The cleaved GSDMD product with defective oligomerization lost its cytotoxicity.** 293T/17 cells were transfected with GSDMD(1-249). The supernatant was collected for LDH assay (**A**). Data are mean  $\pm$  SD ( $n = 3$  per group). \*\*\* $p < 0.001$ . Phase-contrast photography was shown in (**B**).

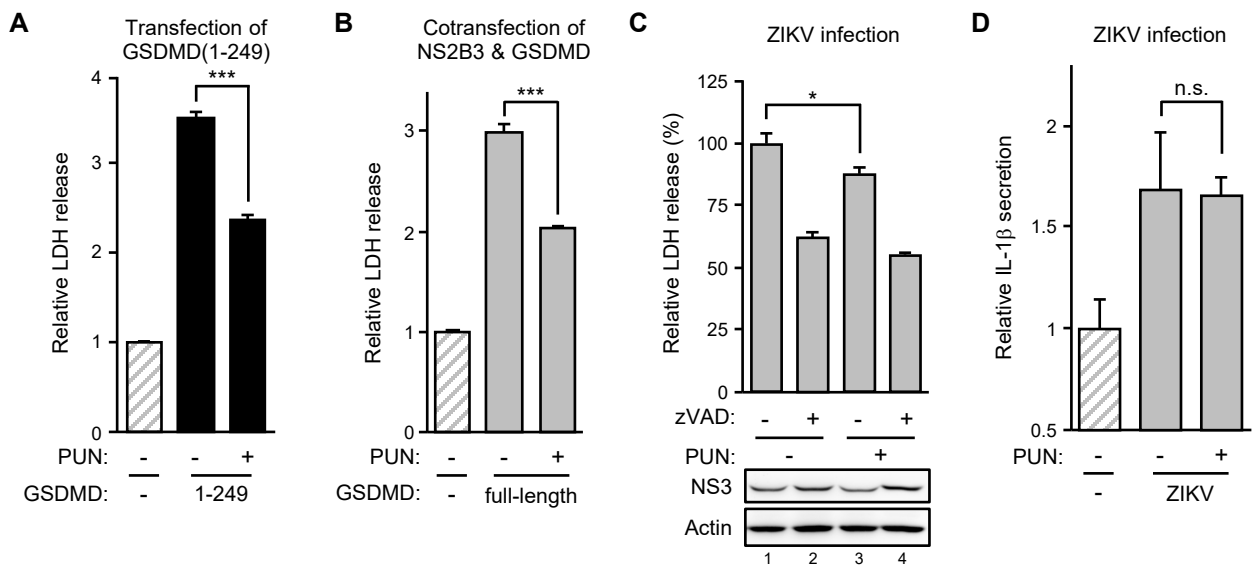

**Figure S7. Punicalagin attenuates ZIKV-induced cytotoxicity.** (A) 293T/17 cells were transfected with GSDMD(1-249) in the absence (-) or presence (+) of punicalagin (PUN, 10  $\mu$ M). Released LDH was analyzed. (B) 293T/17 cells were cotransfected with full-length GSDMD and NS2B3 in the absence (-) or presence (+) of PUN (10  $\mu$ M). Released LDH was analyzed. (C, D) SF268 cells were infected with ZIKV in the absence (-) or presence (+) of PUN (10  $\mu$ M) or zVAD (50  $\mu$ M). Released LDH (upper panel) and cell lysates (lower panel) were analyzed (C). IL-1 $\beta$  secretion (D) was determined. Data are mean  $\pm$  SD,  $n = 3$  per group. \* $p < 0.05$ , \*\*\* $p < 0.001$ , and n.s., not significant.



## **Supplemental Methods and Materials**

### **Inhibitor**

Punicalagin (PUN) (P0023) was from Sigma-Aldrich (Saint Louis, MO, USA).

### **Cell line**

Murine neuroblastoma N18 cells<sup>1</sup> were grown in RPMI (SH30027.01, HyClone, Logan, UT, USA) containing 5% FBS.

### **Plasmids**

The GSDMD(1-249/F240L) was obtained by single-primer PCR mutagenesis with GSDMD(1-249)-V5 used as a template and the primer 5' CGGATAAGAAGCAGAGGACCCTGCAGCCACCCGCGACA-3'. Murine GSDMD (MR207809) was from OriGene Technologies (Rockville, MD, USA).

### **Antibodies**

The primary antibodies against ZIKV NS1 (YH0023) and Caspase-1 (#3866) were from Yao-Hong Biotechnology (Taiwan) and Cell Signaling Technology (Beverly, MA, USA), respectively.
